# Supplementary material for: Surveying the global landscape of post-transcriptional regulators
Source: Springer Nature journal article supplement (doi:10.1038/s41594-023-00999-5), 2023-05-25
Supplement: 41594_2023_999_MOESM1_ESM.pdf [file 41594_2023_999_MOESM1_ESM.pdf]

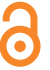

---

# Surveying the global landscape of post-transcriptional regulators

---

In the format provided by the authors and unedited

## Tables

**Supplementary Table 1: Plasmids used in this study.**

| Plasmid name | Purpose                           | Expression cassette                                                                              | Source     |
|--------------|-----------------------------------|--------------------------------------------------------------------------------------------------|------------|
| pKS038       | Sgn1 tethering vector             | pPGK1::SGN1- $\lambda$ N-SpHis5::tADH1 ARS/CEN                                                   | This study |
| pKS109       | Halo control tethering vector     | pPGK1::Halo- $\lambda$ N-SpHis5::tADH1 ARS/CEN                                                   | This study |
| pKS132       | Library in-frame selection vector | pPGK1:: $\lambda$ N-P2A-SpHis5::tAgTEF ARS/CEN                                                   | This study |
| pKS137       | Library tethering vector          | pPGK1:: $\lambda$ N-T2A*-1xFLAG-BFP-NES::tADH1<br>pAgTEF::SpHIS5::tAgTEF ARS/CEN                 | This study |
| pKS151       | Ded1(14-178) tethering vector     | pPGK1::Ded1(14-178)- $\lambda$ N-T2A*-1xFLAG-BFP-NES::tADH1<br>pAgTEF::SpHIS5::tAgTEF ARS/CEN    | This study |
| pKS152       | Ebs1(691-876) tethering vector    | pPGK1::Ebs1(691-876)- $\lambda$ N-T2A*-1xFLAG-BFP-NES::tADH1<br>pAgTEF::SpHIS5::tAgTEF ARS/CEN   | This study |
| pKS153       | Hsp26(1-182) tethering vector     | pPGK1::Hsp26(1-182)- $\lambda$ N-T2A*-1xFLAG-BFP-NES::tADH1<br>pAgTEF::SpHIS5::tAgTEF ARS/CEN    | This study |
| pKS154       | Ngr1(474-626) tethering vector    | pPGK1::Ngr1(474-626)- $\lambda$ N-T2A*-1xFLAG-BFP-NES::tADH1<br>pAgTEF::SpHIS5::tAgTEF ARS/CEN   | This study |
| pKS155       | Tif35(115-239) tethering vector   | pPGK1::Tif35(115-239)- $\lambda$ N-T2A*-1xFLAG-BFP-NES::tADH1<br>pAgTEF::SpHIS5::tAgTEF ARS/CEN  | This study |
| pKS156       | Gta1(603-767) tethering vector    | pPGK1::Gta1(603-767)- $\lambda$ N-T2A*-1xFLAG-BFP-NES::tADH1<br>pAgTEF::SpHIS5::tAgTEF ARS/CEN   | This study |
| pKS160       | Her1(1025-1142) tethering vector  | pPGK1::Her1(1025-1142)- $\lambda$ N-T2A*-1xFLAG-BFP-NES::tADH1<br>pAgTEF::SpHIS5::tAgTEF ARS/CEN | This study |
| pKS171       | Sro9(14-151) tethering vector     | pPGK1::Sro9(14-151)- $\lambda$ N-T2A*-1xFLAG-BFP-NES::tADH1<br>pAgTEF::SpHIS5::tAgTEF ARS/CEN    | This study |
| pKS173       | Sbp1(1-108) tethering vector      | pPGK1::Sbp1(1-108)- $\lambda$ N-T2A*-1xFLAG-BFP-NES::tADH1<br>pAgTEF::SpHIS5::tAgTEF ARS/CEN     | This study |
| pKS174       | Smy2(65-232) tethering vector     | pPGK1::Smy2(65-232)- $\lambda$ N-T2A*-1xFLAG-BFP-NES::tADH1<br>pAgTEF::SpHIS5::tAgTEF ARS/CEN    | This study |

|         |                                       |                                                                                        |            |
|---------|---------------------------------------|----------------------------------------------------------------------------------------|------------|
| pKS176  | Jsn1(144-295) tethering vector        | pPGK1::Jsn1(144-295)-λN-T2A*-1xFLAG-BFP-NES::tADH1 pAgTEF::SpHIS5::tAgTEF ARS/CEN      | This study |
| pKS177  | Cdc48 tethering vector                | pPGK1::CDC48-λN-T2A*-1xFLAG-BFP-NES::tADH1 pAgTEF::SpHIS5::tAgTEF ARS/CEN              | This study |
| pKS179  | Yap1801 tethering vector              | pPGK1::YAP1801-λN-T2A*-1xFLAG-BFP-NES::tADH1 pAgTEF::SpHIS5::tAgTEF ARS/CEN            | This study |
| pKS180  | Sbp1 tethering vector                 | pPGK1::SBP1-λN-T2A*-1xFLAG-BFP-NES::tADH1 pAgTEF::SpHIS5::tAgTEF ARS/CEN               | This study |
| pKS182  | Sro9 tethering vector                 | pPGK1::SRO9-λN-T2A*-1xFLAG-BFP-NES::tADH1 pAgTEF::SpHIS5::tAgTEF ARS/CEN               | This study |
| pKS183  | Gta1 tethering vector                 | pPGK1::GTA1-λN-T2A*-1xFLAG-BFP-NES::tADH1 pAgTEF::SpHIS5::tAgTEF ARS/CEN               | This study |
| pKS190  | <i>Gta1Δ603-767</i> tethering vector  | pPGK1::Gta1Δ603-767-λN-T2A*-1xFLAG-BFP-NES::tADH1 pAgTEF::SpHIS5::tAgTEF ARS/CEN       | This study |
| pKS192  | Sro9-3xFLAG tethering vector          | pPGK1::SRO9-3xFLAG-λN-T2A*-1xFLAG-BFP-NES::tADH1 pAgTEF::SpHIS5::tAgTEF ARS/CEN        | This study |
| pKS193  | Sro9(1-151)-3xFLAG tethering vector   | pPGK1::SRO9(1-151)-3xFLAG-λN-T2A*-1xFLAG-BFP-NES::tADH1 pAgTEF::SpHIS5::tAgTEF ARS/CEN | This study |
| pKS194  | Sro9(1-251)-3xFLAG tethering vector   | pPGK1::SRO9(1-251)-3xFLAG-λN-T2A*-1xFLAG-BFP-NES::tADH1 pAgTEF::SpHIS5::tAgTEF ARS/CEN | This study |
| pKS196  | Halo-3xFLAG tethering vector          | pPGK1::Halo-3xFLAG-λN-T2A*-1xFLAG-BFP-NES::tADH1 pAgTEF::SpHIS5::tAgTEF ARS/CEN        | This study |
| pKS207  | Gta1 inducible vector                 | pGAL1::GTA1-λN-T2A*-1xFLAG-BFP-NES::tADH1                                              | This study |
| pKS208  | <i>Gta1Δ603-767</i> inducible vector  | pGAL1::Gta1Δ603-767-λN-T2A*-1xFLAG-BFP-NES::tADH1                                      | This study |
| pKS232  | Halo inducible vector                 | pGAL1::Halo-λN-T2A*-1xFLAG-BFP-NES::tADH1                                              | This study |
| pNTI282 | YFP-boxB vector                       | pCMV::eGFP::5xboxB::poly(A) BGH                                                        | This study |
| pNTI473 | RFP-PP7 vector                        | pPGK1::mCherry::3xPP7::tADH1                                                           | This study |
| pHES795 | ZIF268 synthetic transcription factor | Zif268 DBD-hPR LBD-MSN2 AD                                                             | 91         |

|          |                                                           |                                                       |            |
|----------|-----------------------------------------------------------|-------------------------------------------------------|------------|
|          | vector                                                    |                                                       |            |
| pHES840  | pGAL1 inducible promoter vector                           | pGAL1::YFP                                            | 91         |
| pCfB2189 | Leu <sup>+</sup> vector                                   | KILEU2 at integration site X-3                        | 92         |
| pCfB2225 | Kan <sup>+</sup> vector                                   | KanMX at integration site XII-2                       | 92         |
| pCfB2337 | Hygromycin <sup>+</sup> vector                            | HphMX at integration site XII-5                       | 92         |
| pNTI114  | YFP::boxB integration vector                              | CCR5_3'HR:P_CMV::eGFP::polyA_BGH:CCR5_5'HR            | This Study |
| pNTI252  | RFP::boxB integration vector                              | pFA6a P(PGKI)::mCherry:boxB::T(ADH1) CaURA3 URA3int   | This Study |
| pNTI473  | RFP::PP7 integration vector                               | pFA6a P(PGK1)::mCherry:pp7(x3):T(ADH1) CaURA3 URA3int | This Study |
| pNTI476  | YFP::PP7 vector                                           | pFA6a P(PGK1)::YFP:pp7:T(ADH1) CaURA3 URA3int         | This Study |
| pNTI729  | ZIF268 synthetic transcription factor integratable vector | pADH1::ZIF268::C.albicans tADH1 at site XII-6         | 93         |

**Supplementary Table 2: Strains used in this study.**

| Name   | Genotype                                                                                      | Purpose                      | Source       |
|--------|-----------------------------------------------------------------------------------------------|------------------------------|--------------|
| NIY106 | MAT $\alpha$ his3 $\Delta$ 1 leu2 $\Delta$ 0 lys2 $\Delta$ 0 MET15 pPGKI::mCherry:boxB:CaUra3 | RFP::boxB haploid strain     | This study   |
| NIY111 | MAT $\alpha$ his3 $\Delta$ 1 leu2 $\Delta$ LYS2 met15 $\Delta$ ura3 $\Delta$ 0                | BY4741 MAT $\alpha$ WT yeast | ThermoFisher |
| NIY112 | MAT $\alpha$ his3 $\Delta$ leu2 $\Delta$ 0 lys2 $\Delta$ 0 MET15 ura3 $\Delta$ 0              | BY4742 MAT $\alpha$ WT yeast | ThermoFisher |
| NIY114 | MAT $\alpha$ his3 $\Delta$ 1 leu2 $\Delta$ LYS2 met15 $\Delta$ pPGKI::YFP:boxB:CaUra3         | YFP::boxB haploid strain     | This study   |
| NIY286 | MAT $\alpha$ his3 $\Delta$ 1 leu2 $\Delta$ 0 lys2 $\Delta$ 0 MET15 pPGKI::mCherry:PP7:CaUra3  | RFP::PP7 haploid strain      | This study   |

|        |                                                                                                                                                                                                                                                        |                                                                                                       |            |
|--------|--------------------------------------------------------------------------------------------------------------------------------------------------------------------------------------------------------------------------------------------------------|-------------------------------------------------------------------------------------------------------|------------|
| NIY287 | MAT $\alpha$ his3 $\Delta$ 1 leu2 $\Delta$ LYS2 met15 $\Delta$<br>pPGKI::YFP:pp7:CaUra3                                                                                                                                                                | YFP::PP7 haploid strain                                                                               | This Study |
| NIY289 | MAT $\alpha$ /MAT $\alpha$ his3 $\Delta$ 1/his3 $\Delta$ 1<br>leu2 $\Delta$ 0/leu2 $\Delta$ 0 lys2 $\Delta$ 0/LYS2<br>MET15/met15 $\Delta$<br>pPGKI::mCherry:boxB:CaUra3/pPGKI::<br>YFP:pp7:CaUra3                                                     | YFP::PP7/RFP::boxB dual reporter<br>strain                                                            | This Study |
| NIY293 | MAT $\alpha$ /MAT $\alpha$ his3 $\Delta$ 1/his3 $\Delta$ 1<br>leu2 $\Delta$ 0/leu2 $\Delta$ 0 lys2 $\Delta$ 0/LYS2<br>MET15/met15 $\Delta$<br>pPGKI::mCherry:pp7:CaUra3/pPGKI::Y<br>FP:boxB:CaUra3                                                     | YFP::boxB/RFP::PP7 dual reporter<br>strain                                                            | This study |
| yKS090 | MAT $\alpha$ /MAT $\alpha$ his3 $\Delta$ 1/his3 $\Delta$ 1<br>leu2 $\Delta$ 0/leu2 $\Delta$ 0 lys2 $\Delta$ 0/LYS2<br>MET15/met15 $\Delta$ HygR<br>pPGKI::mCherry:pp7:CaUra3/pPGKI::Y<br>FP:boxB:CaUra3<br>pADH1::ZIF268::tADH1                        | Dual reporter strain NIY293 with<br>ZIF268 synthetic transcription<br>factor integrated at XII-5 site | This study |
| yKS092 | MAT $\alpha$ /MAT $\alpha$ his3 $\Delta$ 1/his3 $\Delta$ 1<br>LEU2/leu2 $\Delta$ 0 lys2 $\Delta$ 0/LYS2<br>MET15/met15 $\Delta$ <i>ubx2<math>\Delta</math></i> /UBX2 KanR<br>pPGKI::mCherry:pp7:CaUra3/pPGKI::Y<br>FP:boxB:CaUra3                      | Dual reporter with 1 copy <i>ubx2<math>\Delta</math></i> , 1<br>copy UXB2                             | This Study |
| yKS093 | MAT $\alpha$ /MAT $\alpha$ his3 $\Delta$ 1/his3 $\Delta$ 1<br>LEU2/leu2 $\Delta$ 0 lys2 $\Delta$ 0/LYS2<br>MET15/met15 $\Delta$ <i>ubx2<math>\Delta</math>/ubx2<math>\Delta</math></i> KanR<br>pPGKI::mCherry:pp7:CaUra3/pPGKI::Y<br>FP:boxB:CaUra3    | Dual reporter <i>ubx2<math>\Delta</math></i> strain                                                   | This study |
| yKS094 | MAT $\alpha$ /MAT $\alpha$ his3 $\Delta$ 1/his3 $\Delta$ 1<br>LEU2/leu2 $\Delta$ 0 lys2 $\Delta$ 0/LYS2<br>MET15/met15 $\Delta$ <i>ubx2<math>\Delta</math>/ubx2<math>\Delta</math>ubx</i> KanR<br>pPGKI::mCherry:pp7:CaUra3/pPGKI::Y<br>FP:boxB:CaUra3 | Dual reporter <i>ubx2<math>\Delta</math>c</i> (no UBX<br>domain) strain                               | This Study |

**Supplementary Table 3: Oligonucleotides used in this study.**

| Name      | Purpose             | Sequence                 | Source     |
|-----------|---------------------|--------------------------|------------|
| NI-AM-163 | <i>mCherry</i> qPCR | CATGGTCTTCTTCTGCATTACG   | This study |
| NI-AM-164 | <i>mCherry</i> qPCR | GACTACTTGAAGCTGTCCTTC    | This study |
| NI-AM-161 | <i>Citrine</i> qPCR | GTCAGCCATGATGTAAACATTGTG | This study |

|           |                      |                                                                      |            |
|-----------|----------------------|----------------------------------------------------------------------|------------|
| NI-AM-162 | <i>Citrine</i> qPCR  | GACGGTAACTACAAGACCAGA                                                | This study |
| KS917     | <i>GTA1</i> qPCR     | CCAGGAGGACTTACACGATGTG                                               | This study |
| KS918     | <i>GTA1</i> qPCR     | GATATTGGATTTCAAGGATTTCCGC                                            | This study |
| KS765     | <i>UBC6</i> qPCR     | CCAGTGATGAAGCCACGACAGG                                               | This study |
| NI-AM-229 | <i>UBC6</i> qPCR     | AAAGGGTCTTCTGTTTCATCACCTGTATTT<br>GC                                 | This study |
| KS877     | <i>ubx2Δ::kanMX</i>  | CCAGAAGAGATGAAGGTGATATATAGGTA<br>GACAGtaggtctagagatctgttagcttgc      | This study |
| KS878     | <i>ubx2Δ::kanMX</i>  | TTGTACGCGTTTGTGCGTTTTTAACGATATG<br>CTATTTTAattaagggttctcgagagctcg    | This study |
| KS879     | <i>ubx2Δ::kanMX</i>  | GGGCTTCGAGCGCGACAATTGGTGGGTGG<br>TGGCCAGAAGAGATGAAGGTGATATATA<br>GG  | This study |
| KS880     | <i>ubx2Δ::kanMX</i>  | ACGAAAAATGAAAAAAAAGTAAACTCCAG<br>AAACTCTTTGTACGCGTTTGTGCGTTTTTAAC    | This study |
| KS881     | <i>ubx2Δ::KILEU2</i> | CGATAGAAGTATGTAATAGCTTTCATAGTG<br>TAATCGAAGGATCCGCAGGCTAACCGGAA<br>C | This study |
| KS882     | <i>ubx2Δ::KILEU2</i> | ATTTGGCCATAGCTGGGGCACTTGGTCCAC<br>CGAACCATTCAAATTGAACAGAGAAGTCA<br>G | This study |

|       |                             |                                                                      |            |
|-------|-----------------------------|----------------------------------------------------------------------|------------|
| KS883 | <i>ubx2Δ::KILEU2</i>        | AGACAGTGTATTTTGTAGCAGCAGGTATTA<br>CGATAGAAGTATGTAATAGCTTTCATAGTG     | This study |
| KS884 | <i>ubx2Δ::KILEU2</i>        | TCTTCATCTTCTTCATCCAGTGCTTCCACTA<br>GAAGACTGCCATTTGGCCATAGCTGGGGC     | This study |
| KS838 | <i>ubx2Δc::KILEU2</i>       | CACGCTCAGGATTTGAAATTAAACTCAACT<br>GCTCGGTAAGGCGCGCCACTTCTAAATAA<br>G | This study |
| KS839 | <i>ubx2Δc::KILEU2</i>       | CTCATCGATGCAAGCCTTTAACCATTTTAA<br>TTGACCATTCAAATTGAACAGAGAAGTCA<br>G | This study |
| KS840 | <i>ubx2Δc::KILEU2</i>       | AATCAAAGCTATAGAAAAGGAAAAGAGCT<br>TGAAACACGCTCAGGATTTGAAATTAAACT<br>C | This study |
| KS841 | <i>ubx2Δc::KILEU2</i>       | GAGTAGCTTGCTTCCCCGTTGTCTCGAACG<br>GCTGTATCTCATCGATGCAAGCCTTTAACC     | This study |
| KS842 | <i>ubx2Δc::KILEU2</i> check | CGTGGTGGAAAAGTACACTCCAG                                              | This study |
| KS843 | <i>ubx2Δc::KILEU2</i> check | CCTGAGAAAGCAACCTGACCTAC                                              | This study |
| KS844 | <i>ubx2Δc::KILEU2</i> check | CCGCGAGGTATATGTGACACCC                                               | This study |
