# Supplementary material for: Surveying the global landscape of post-transcriptional regulators
Source: Springer Nature journal article supplement (doi:10.1038/s41594-023-00999-5), 2023-05-25
Supplement: 41594_2023_999_MOESM9_ESM.pdf [file 41594_2023_999_MOESM9_ESM.pdf]

**Extended Data Fig. 7b**

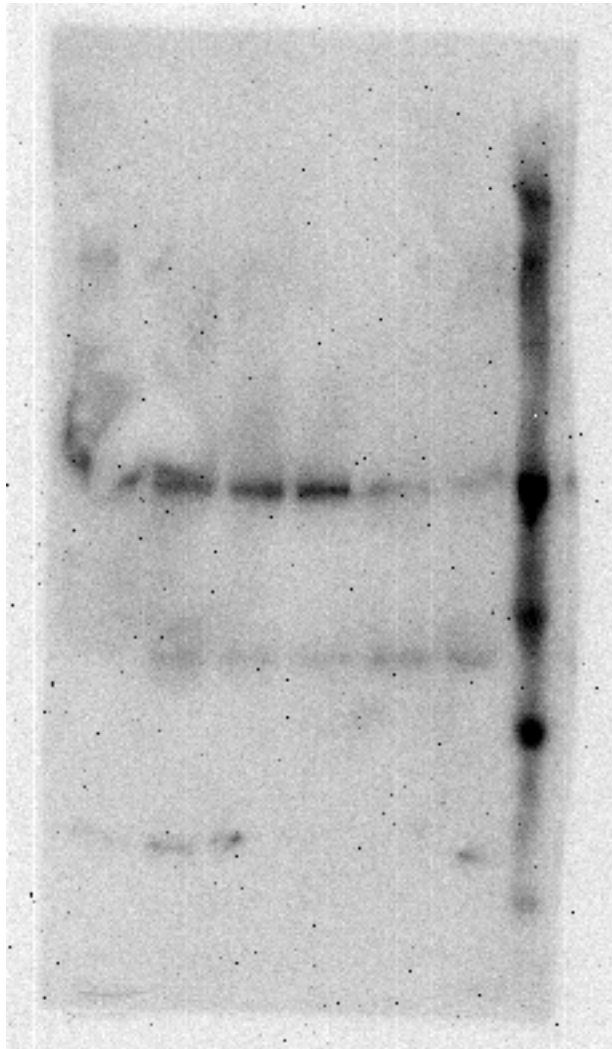

**Sample order:**  
Halo control 2  
Halo control 1  
Sro9 full-length 2  
Sro9 full-length 1  
Sro9(1-151) 2  
Sro9(1-151) 1

**62**

**49**

**38**

**Pab1 expected size: 64 kDa**

**Extended Data Fig. 7b**

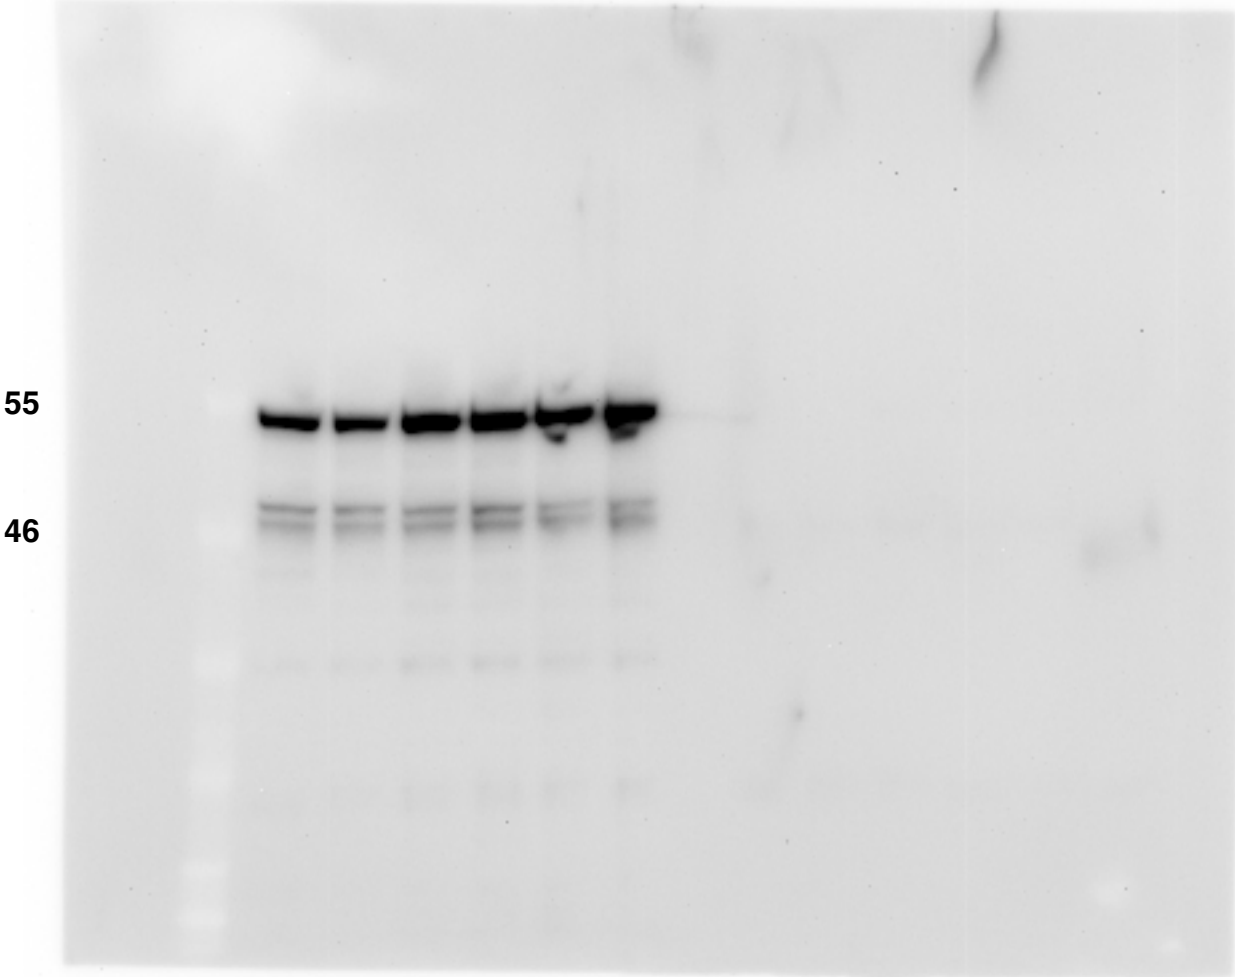

**Hxk2 expected size: 54 kDa**

Extended Data Fig. 7a

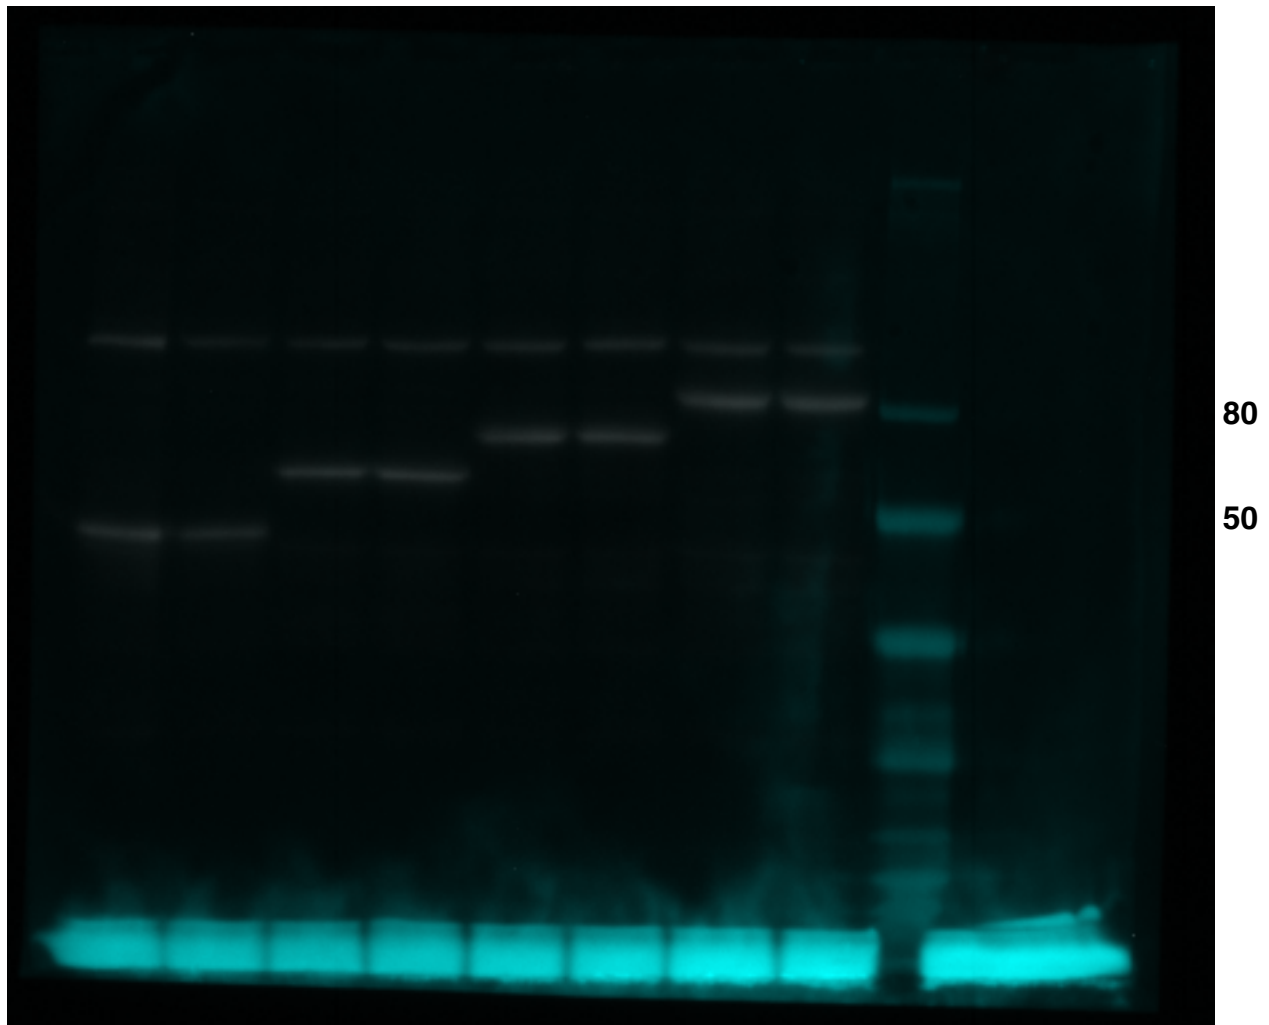

**Gel order:**

Sro9-FLAG-BFP rep 1: 84 kDa

Sro9-FLAG-BFP rep 2: 84 kDa

Sro9(1-251)-FLAG-BFP rep 1: 64 kDa

Sro9(1-251)-FLAG-BFP rep 2: 64 kDa

Sro9(252-434)-FLAG-BFP rep 1: 56 kDa

Sro9(252-434)-FLAG-BFP rep 2: 56 kDa

Sro9(1-151)-FLAG-BFP rep 1: 51 kDa

Sro9(1-151)-FLAG-BFP rep 2: 51 kDa
